# Supplementary material for: Economic analysis of palonosetron versus granisetron in the standard triplet regimen for preventing chemotherapy-induced nausea and vomiting in patients receiving highly emetogenic chemotherapy in Japan (TRIPLE phase III trial)
Source: J Pharm Health Care Sci. 2018 Dec 10;4:31. doi: 10.1186/s40780-018-0128-9 (PMC6287343; doi:10.1186/s40780-018-0128-9)
Supplement: Supplementary file 3 — Table S2. Drug cost of antiemetics on the National Health Insurance drug price standard in 2017. (XLS 18 kb) [file 40780_2018_128_MOESM3_ESM.xls]

## Sheet: Suppl Table
	Table S2 Drug cost of antiemetics on the National Health Insurance drug price standard in 2017
	Classification	Active ingredient ( JAN )	Dosage forms	Dose	National Health Insurance drug price ( JPY )National Health Insurance drug price ( JPY )National Health Insurance drug price ( JPY )
					Brand-name	Generic
	5-HT3 receptor antagonist	Palonosetron Hydrochloride	Injection ( VIAL )	0.75 mg	14937	―
		Granisetron Hydrochloride	Injection ( AMPULE )	1 mg	1485	677
		Ramosetron HydrochlorideRamosetron HydrochlorideRamosetron Hydrochloride	Injection ( AMPULE )	0.3 mg	4345	1957
			Tablet	0.1 mg	1215.5	―
		Ondansetron	Tablet	4 mg	1153.2	―
	NK1 receptor antagonist	Aprepitant	Capsule	Tri-pack	11758.7	―
			Capsule	80 mg	3393	―
	Corticosteroid	Dexamethasone sodium phosphate	Injection ( VIAL )	6.6 mg	335	170
			Injection ( AMPULE )	3.3 mg	181	92
			Injection ( AMPULE )	1.65 mg	103	56
		Dexamethasone	Tablet	0.5 mg	5.6	―
	Prokinetic agent	Domperidone	Suppository	30 mg	95.6	45.6
			Suppository	60 mg	129.3	―
			Tablet	10 mg	15.1	5.6
		Metoclopramide hydrochloride	Injection ( AMPULE )	10 mg	57	56
			Tablet	5 mg	6.4	5.6
	Phenothiazine antipsychotic	Prochlorperazine MaleateProchlorperazine Maleate	Injection ( AMPULE )	5 mg	59	―
			Tablet	5 mg	9.6	―
		Chlorpromazine Hydrochloride	Tablet	12.5 mg	9.2	―
	Antihistamine	Hydroxyzine Hydrochloride	Injection ( AMPULE )	25 mg	56	―
		Hydroxyzine Pamoate	Capsule	25 mg	6.2	5.6
		Chlorpheniramine Maleate	Injection ( AMPULE )	10 mg	92	―
		Diphenhydramine Salicylate*	Tablet	40 mg	5.8	―
	Benzodiazepine Compound	Alprazolam	Tablet	0.4 mg	8.5	5.6
		Lorazepam	Tablet	0.5 mg	5.8	5
		Etizolam	Tablet	0.5 mg	9	6
				1 mg	12.1	6.4
	Others	Haloperidol	Injection ( AMPULE )	5 mg	89	56
		Olanzapine	Tablet	5 mg	258.3	83.5
		Lansoprazole	Tablet	15 mg	80.6	31.5
		Famotidine	Tablet	10 mg	24.6	9.9
		Dicyclomine Hydrochloride**	Granule	5 mg	6.2	5.9
		Mosapride Citrate Hydrate	Tablet	5 mg	16.9	9.9
	Fluid infusion	Saline	Injection	50 mL	110	―
				100 mL	113	―
				500 mL	149	―
		7.5% glucose/electrolyte infusion	Injection	500 mL	141	125
		5% D‐sorbitol‐lactated Ringer’s solution	Injection	500 mL	―	142
	The costs of pharmaceutical products as antiemetics was calculated based on the National Health Insurance drug price standard in 2017,
	when TRIPLE study was conducted and was considered as direct costs of medical care.
	JAN: Japanese Accepted Name
	JPY: Japanese yen (rate: 1 US dollar = 110.57 JPY, 1 euro = 128.85 JPY, July. 4, 2018)
	* :Travelmin®; Diphenhydramine Salicylate 40mg and Diprophylline 26mg
	** : Kolantyl®; Dicyclomine Hydrochloride 5mg, Dried Aluminum Hydroxide Gel 400mg and Magnesium Oxide 200mg

## Sheet: 参考
	Suppl. Table 1.Summary of Received Chemotherapy Regimens
	Regimen	n (%)n (%)
		Arm G	Arm P	Total
	CDDP monotherapy	16 (4%)	25 (6%)	41 (5%)
	CDDP + 5-FU	53 (13%)	52 (13%)	105 (13%)
	CDDP + 5-FU + Docetaxel	9 (2%)	8 (2%)	17 (2%)
	CDDP + Irinotecan	36 (9%)	30 (7%)	66 (8%)
	CDDP + Etoposide	46 (11%)	48 (12%)	94 (11%)
	CDDP + Vinorelbine	71 (17%)	72 (17%)	143 (17%)
	CDDP + Gemcitabine	22 (5%)	17 (4%)	39 (5%)
	CDDP + Gemcitabine + Bevacizumab	0 (0%)	2 (0.5%)	2 (0.2%)
	CDDP + Docetaxel	12 (3%)	10 (2%)	22 (3%)
	CDDP + Docetaxel + Bevacizumab	3 (1%)	2 (0.5%)	5 (1%)
	CDDP + Pemetrexed	76 (18%)	69 (17%)	145 (18%)
	CDDP + Pemetrexed + Bevacizumab	7 (2%)	7 (2%)	14 (2%)
	CDDP + TS-1	48 (12%)	53 (13%)	101 (12%)
	CDDP + TS-1 + Trastuzumab	0 (0%)	1 (0.2%)	1 (0.1%)
	CDDP + TS-1 + Docetaxel	2 (0.5%)	8 (2%)	10 (1%)
	CDDP + TS-1 + Docetaxel + Trastuzumab	1 (0.2%)	1 (0.2%)	2 (0.2%)
	CDDP + Capecitabine	5 (1%)	6 (1%)	11 (1%)
	CDDP + Capecitabine + Trastuzumab	6 (1%)	3 (1%)	9 (1%)
	CDDP shows Cisplatin.
